# Supplementary material
Source: ML conference proceedings conference paper supplement (https://openreview.net/forum?id=9AtlhmFVDi)

Attention std deviation

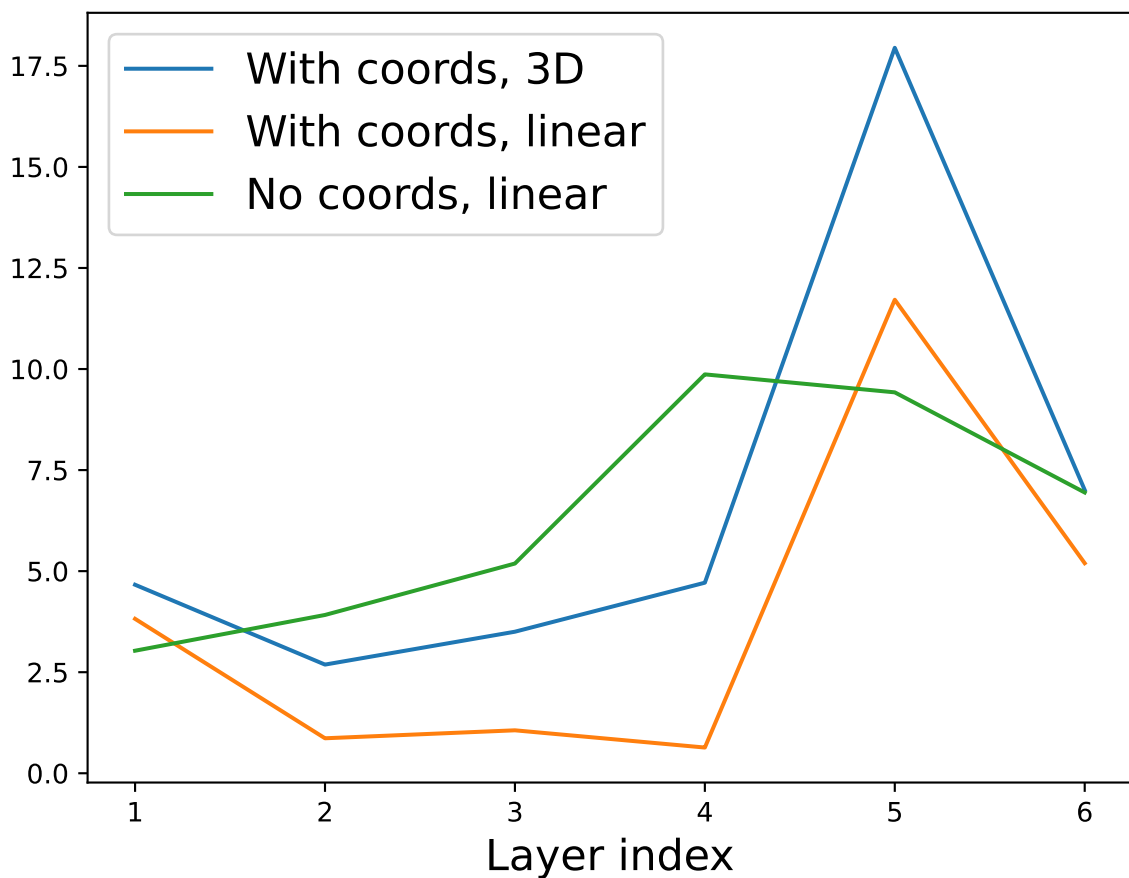

Supplement: supplementary_material [file attachment]

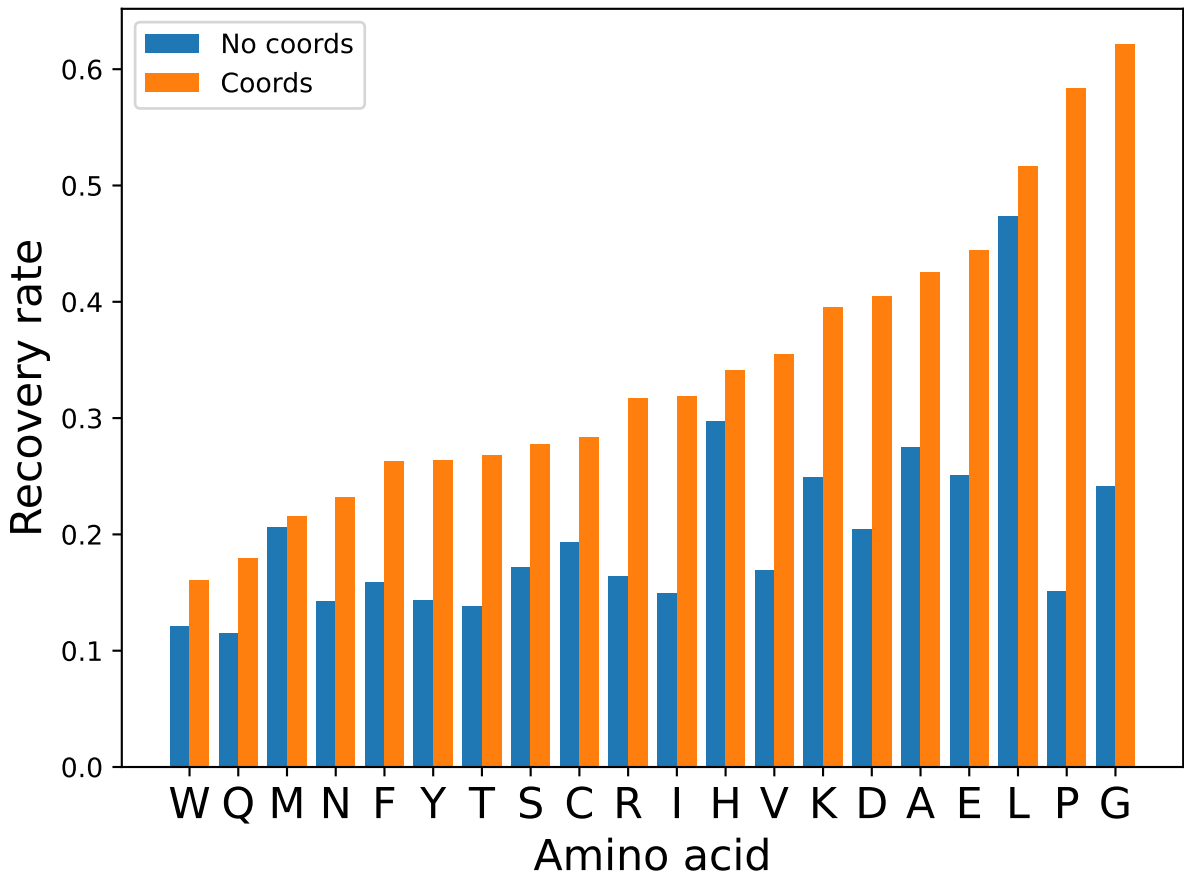

Supplement: supplementary_material [file attachment]

Attention amplitude

- With coords, 3D
- With coords, linear
- No coords, linear

1 2 3 4 5 6

Layer index

0.0  
0.1  
0.2  
0.3  
0.4

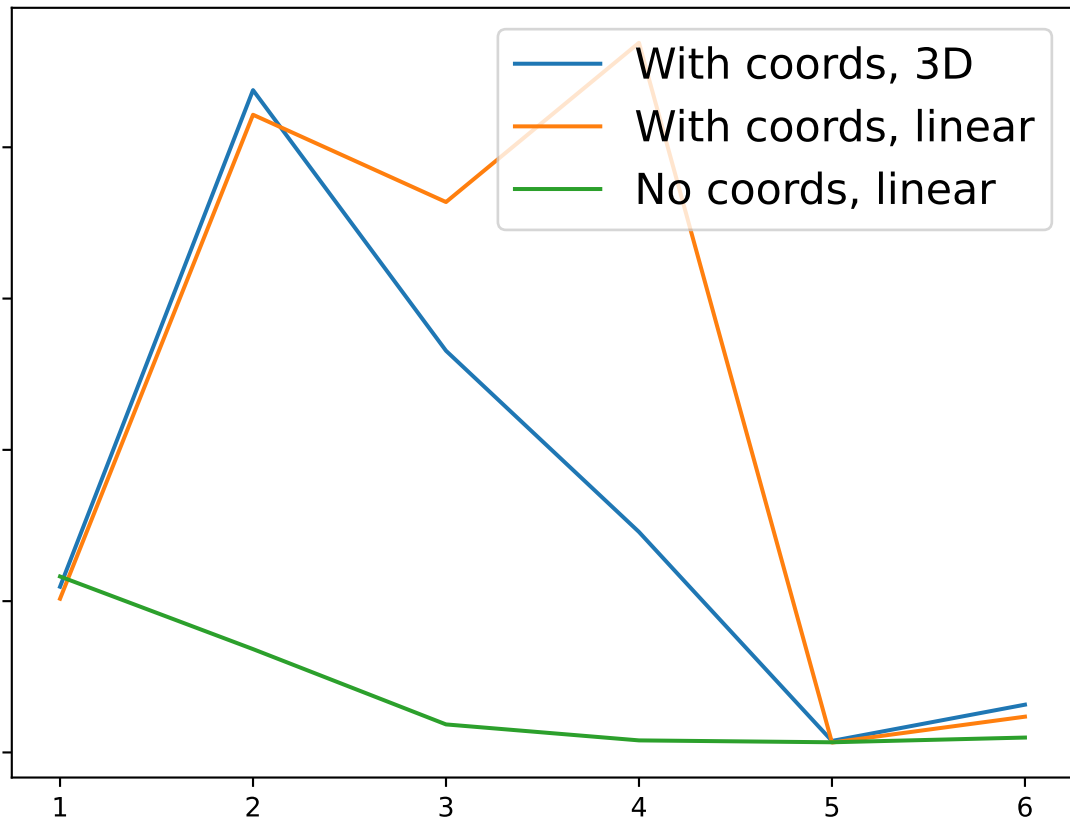

Supplement: supplementary_material [file attachment]

Rolling average loss per epoch

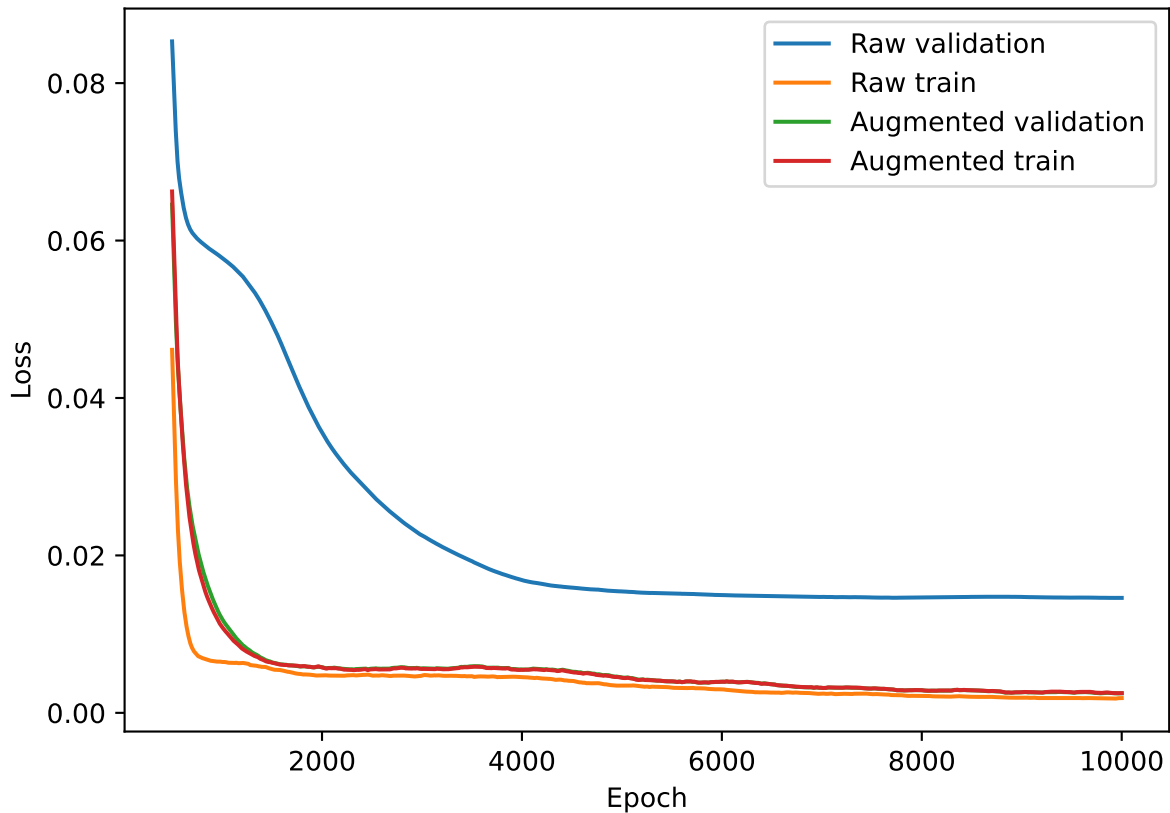

Supplement: supplementary_material [file attachment]

Train perplexity

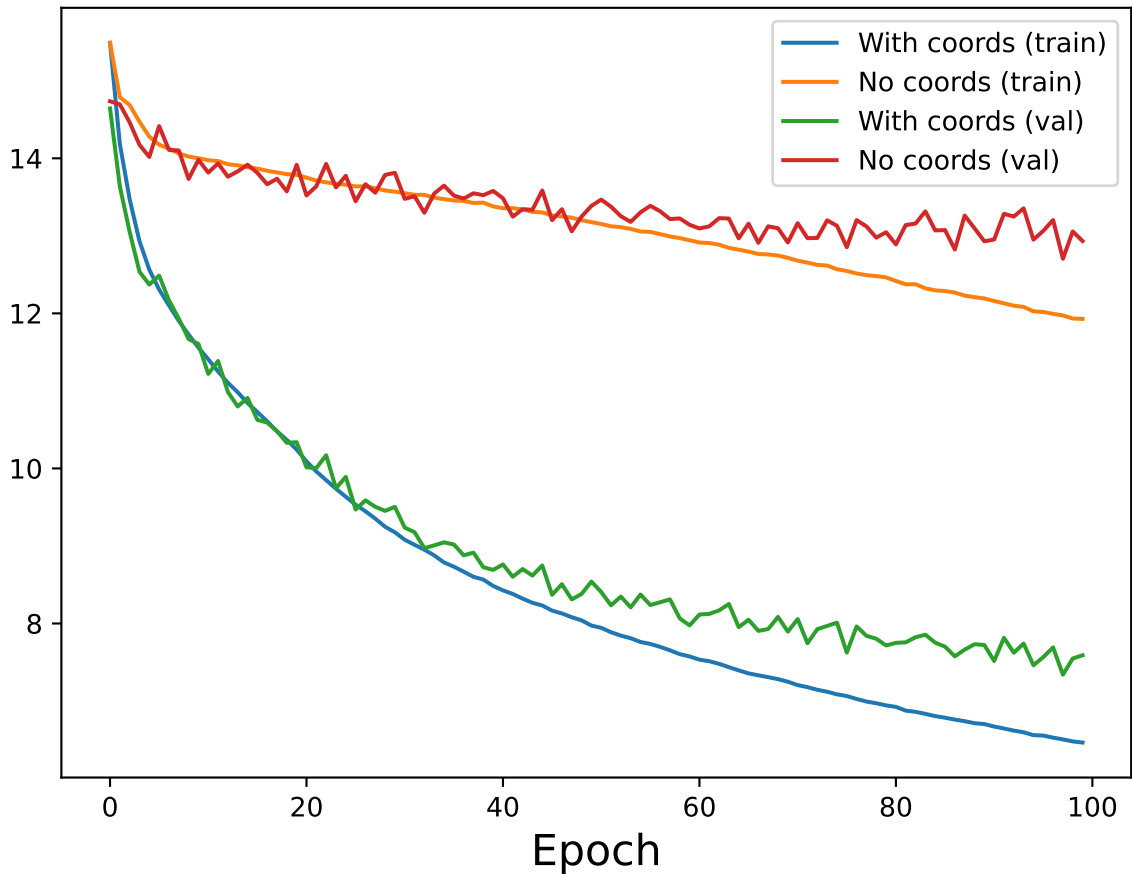

Supplement: supplementary_material [file attachment]

Accuracy at determining  $\exp(-d^p)$

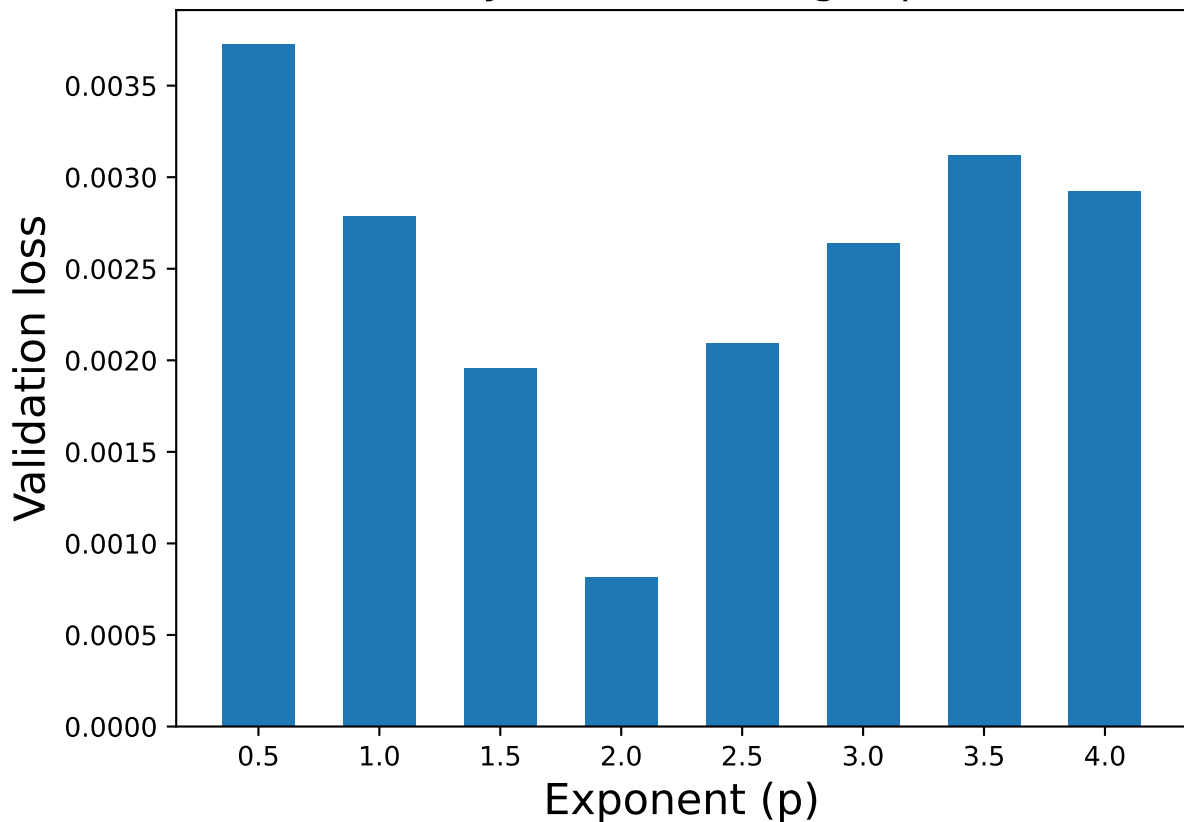

Supplement: supplementary_material [file attachment]

Accuracy depending on head dimension

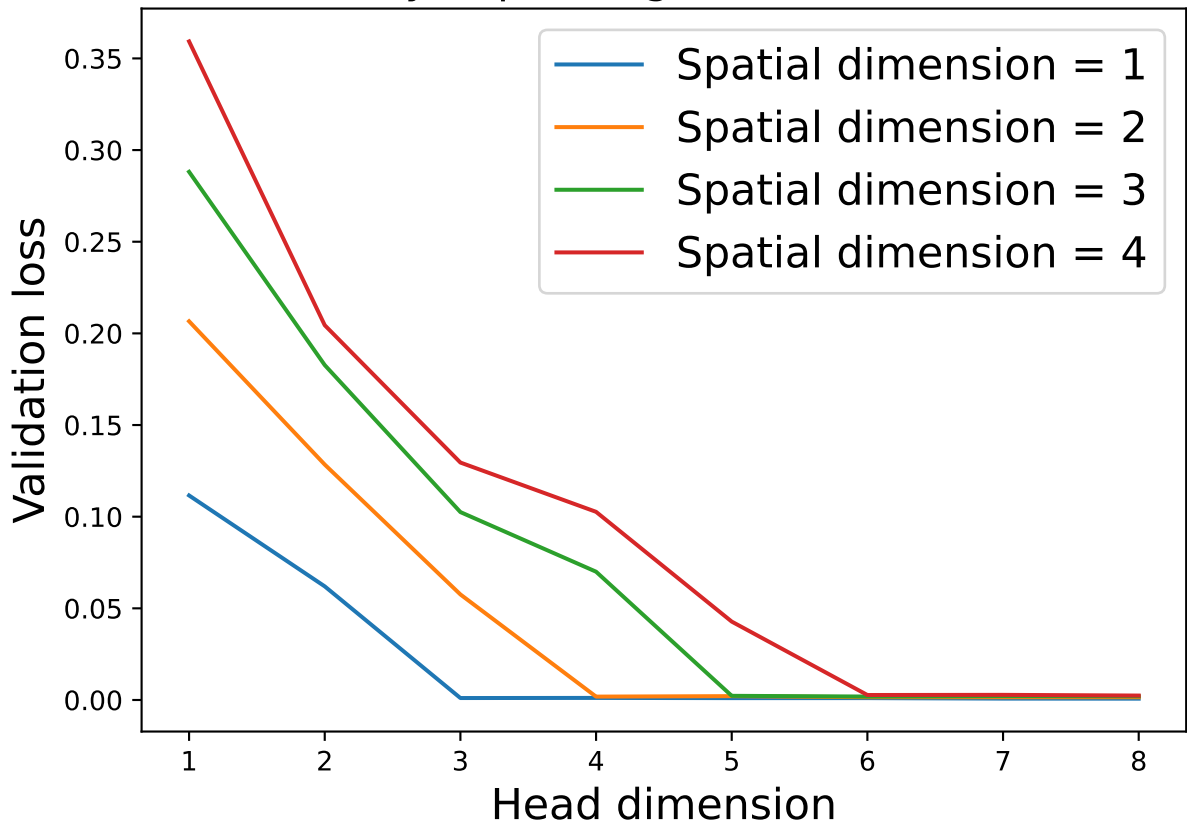

Supplement: supplementary_material [file attachment]
